# Supplementary material for: Passive-dynamic ankle-foot orthosis improves medium-term clinical outcomes after severe lower extremity trauma
Source: PubMed Central journal article supplement — J R Army Med Corps. 2018 Nov 9;165(5):330–7. doi: 10.1136/jramc-2018-001082 (PMC6839716; doi:10.1136/jramc-2018-001082), 2018-11-09
Supplement: jramc-2018-001082supp001.pdf [file jramc-2018-001082supp001.pdf]

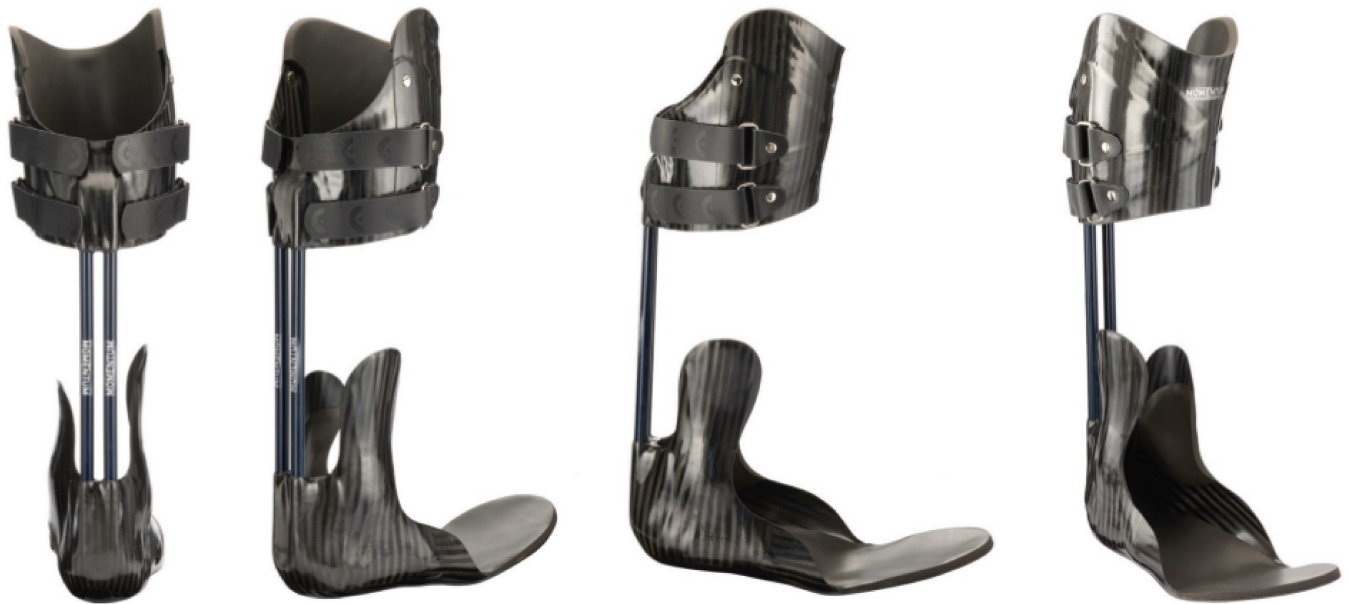

**Electronic Supplementary File 1:** Images of the passive-dynamic ankle foot orthosis (PDAFO). (A) Posterior, (B) Posterior-Lateral, (C) Lateral, (D) Frontal-Lateral view. Images of the Momentum<sup>®</sup> brace (PDAFO) sourced with permission from Blatchford.
